# Supplementary material for: COM e: the ontology of bioinorganic proteins
Source: Springer Nature journal article supplement (doi:10.1186/1472-6807-4-3), 2004-02-27
Supplement: Additional file 3 [file 1472-6807-4-3-s3.pdf]

**Table S3<sup>a</sup>**

---

| <b>Coordination polyhedra</b>          |                          |                            |
|----------------------------------------|--------------------------|----------------------------|
| <b>Coordination polyhedron</b>         | <b>Polyhedral symbol</b> | <b>Coordination number</b> |
| Linear                                 | <i>L-2</i>               | 2                          |
| Angular                                | <i>A-2</i>               | 2                          |
| Trigonal plane                         | <i>TP-3</i>              | 3                          |
| T-shaped <sup>b</sup>                  | <i>PTS-3<sup>b</sup></i> | 3                          |
| Trigonal pyramid                       | <i>TPY-3</i>             | 3                          |
| Tetrahedron                            | <i>T-4</i>               | 4                          |
| Square plane                           | <i>SP-4</i>              | 4                          |
| Square pyramid                         | <i>SPY-4</i>             | 4                          |
| Trigonal pyramid <sup>b</sup>          | <i>TPY-4<sup>b</sup></i> | 4                          |
| Trigonal bipyramid                     | <i>TBPY-5</i>            | 5                          |
| Square pyramid                         | <i>SPY-5</i>             | 5                          |
| Octahedron                             | <i>OC-6</i>              | 6                          |
| Trigonal prism                         | <i>TPR-6</i>             | 6                          |
| Pentagonal bipyramid                   | <i>PBPY-7</i>            | 7                          |
| Octahedron, face monocapped            | <i>OCF-7</i>             | 7                          |
| Trigonal prism, square face monocapped | <i>TPRS-7</i>            | 7                          |
| Cube                                   | <i>CU-8</i>              | 8                          |
| Square antiprism                       | <i>SARP-8</i>            | 8                          |
| Dodecahedron                           | <i>DD-8</i>              | 8                          |

---

## References

*a.* Unless indicated, the polyhedral symbols used are as in: Leigh GJ (Ed)

**Nomenclature of Inorganic Chemistry, Recommendations 1990.** Oxford:  
Blackwell Scientific Publications; 1990, p. 165

*b.* Not an IUPAC symbol.
